# Supplementary material
Source: PubMed Central journal article supplement (PMC4988952)
Supplement: NIHMS757551-supplement-Supp_Info.pdf [file NIHMS757551-supplement-Supp_Info.pdf]

# Web-based Supplementary Materials for ”Marginal Mean Models for Zero-Inflated Count Data” by D. Todem, W-W Hsu and KM Kim

## Web Appendix A: Additional simulation studies

We conduct an additional simulation study to evaluate the finite sample performances of the derived and the direct estimates of covariates effects on the marginal mean when a second order Taylor expansion of  $\log\{\pi_i\}$  is invoked. For this simulation, we continue to assume that the exposure of interest is binary  $v_{1i}$  and the confounder  $v_{2i}$  is continuous. The data are generated from a ZINB with dispersion parameter  $\kappa = 0.5$ , and the true models for  $\mu_i$  and  $\pi_i$  given by  $\log\{\mu_i\} = 1.5 - 0.5v_{1i} - 0.1v_{2i}$  and  $\text{logit}\{\pi_i\} = 1.5 - 0.5v_{1i} - 0.2v_{2i}$ . The working regression models for  $\mu_i$  and  $\pi_i$  are  $\log\{\mu_i\} = \alpha_0 + \alpha_1v_{1i} + \alpha_2v_{2i}$  and  $\text{logit}\{\pi_i\} = \gamma_0 + \gamma_1v_{1i} + \gamma_2v_{2i}$ . From these working models, the MR estimate for the derived approach was computed assuming a second order Taylor expansion of  $\log\{\pi_i\}$ . This expansion includes the terms  $v_{1i}$ ,  $v_{2i}$ ,  $v_{2i}^2$ , and  $v_{1i}v_{2i}$ . We also used these terms to fit the marginal log-logit model with mean  $\log\{E(Y_i|V_i)\} = \beta_0 + \beta_1v_{1i} + \beta_2v_{2i} + \beta_3v_{2i}^2 + \beta_4v_{1i}v_{2i}$ . Estimates of the true MR are  $\exp\{\hat{\beta}_{1,der} + 0.5\hat{\beta}_{3,der}^2\}$  and  $\exp\{\hat{\beta}_{1,dir} + 0.5\hat{\beta}_{3,dir}^2\}$  for the derived and the direct methods. Finally, all simulations were replicated 500 times and for sample sizes 100, 400 and 1000.

Table W.1: Simulation results for the mean ratio (exposed vs unexposed), using the derived estimations from a conditional (conventional) log-logit model, and the direct estimation from a marginal log-logit working model, data generated from ZINB models, 500 resamples

| True MR | $n^\mp$ | Conditional log-logit working model |        |       |       | Marginal log-logit working model |        |       |       |
|---------|---------|-------------------------------------|--------|-------|-------|----------------------------------|--------|-------|-------|
|         |         | Derived marginal estimation         |        |       |       | Direct marginal estimation       |        |       |       |
|         |         | EMR                                 | % bias | MSE   | CP(%) | EMR                              | % bias | MSE   | CP(%) |
| 0.543   | 100     | 0.569                               | 4.800  | 0.021 | 96.7  | 0.584                            | 7.473  | 0.025 | 94.1  |
|         | 400     | 0.546                               | 0.541  | 0.004 | >99.9 | 0.549                            | 1.103  | 0.004 | 93.4  |
|         | 1000    | 0.542                               | -0.154 | 0.002 | >99.9 | 0.544                            | 0.102  | 0.002 | 92.4  |

$^\mp n/2$  is sample size per group; Data generated from ZINB model with a conditionally specified mean.

Results in Table W.1 show that when higher order variables are added in the design matrix for the marginal mean, we continue to have satisfactory results in that the bias on the mean ratio between the exposed and the unexposed groups is very negligible for the derived and direct estimates of the true mean ratio. Moreover the average MSE also decreases with increasing sample sizes leading to a conjecture that the invoked estimates are consistent. Most importantly, the direct estimation approach based on  $\hat{\beta}_{dir}$  continue to have appropriate coverage probabilities at the nominal 95% level, despite the fact that additional variables are added in the model. However, the derived estimation approach continues to exhibit 95% coverage probabilities higher than the nominal level.

## Web Appendix B: Additional simulation studies

Finally, we conduct a simulation study to evaluate the accuracy of the Taylor approximation when a first order Taylor expansion of  $\log\{\pi_i\}$  is assumed. More specifically, we compare the derived marginal mean on the log scale  $\hat{\beta}'_{der}\mathbf{X}_i$  with  $\mathbf{X}_i = \mathbf{V}_i = (1, v_{1i}, v_{2i})'$  to the log of the fitted mean  $\pi_i(\hat{\gamma})\mu_i(\hat{\alpha})$  from the fitted latent class regression models for  $\pi_i$  and  $\mu_i$ , using Pearson and the Spearman correlations. In this study, we assume the same setting as in the paper with the exposure of interest being binary  $v_{1i}$  and the confounder  $v_{2i}$  continuous. Results in Table W.2 show satisfactory results for the approximation with average Person and Spearman correlations between  $\log\{\pi_i(\hat{\gamma})\mu_i(\hat{\alpha})\}$  and  $\hat{\beta}'_{der}\mathbf{X}_i$  being above 97%.

Table W.2: Simulation results comparing  $\log\{\pi_i(\hat{\gamma})\mu_i(\hat{\alpha})\}$  and  $\hat{\beta}'_{der}\mathbf{X}_i$  with  $\mathbf{X}_i = \mathbf{V}_i = (1, v_{1i}, v_{2i})'$  from working latent class regression models for  $\pi_i$  and  $\mu_i$ , using Pearson and the Spearman correlations with data were generated from ZINB models with marginally and conditionally specified means

| $n^\ddagger$ | ZINB model with a conditionally specified mean |         | ZINB model with a marginally specified mean |         |
|--------------|------------------------------------------------|---------|---------------------------------------------|---------|
|              | Spearman                                       | Pearson | Spearman                                    | Pearson |
| 100          | 0.974                                          | 0.983   | 0.979                                       | 0.993   |
| 200          | 0.993                                          | 0.996   | 0.995                                       | 0.999   |
| 400          | >0.999                                         | >0.999  | 0.997                                       | >0.999  |
| 1000         | >0.999                                         | >0.999  | >0.999                                      | >0.999  |

$^\ddagger n/2$  is sample size per group

## Web Appendix C: Additional analysis of the Detroit Caries indices in primary dentition

Table W.3: Parameter estimates, standard errors (SE) and p-values for ZINB model under the marginal log-logit models with higher order covariate terms, consistent with a 2nd order Taylor expansion

| <i>Effects</i>                              | Estimate | SE      | p-value |
|---------------------------------------------|----------|---------|---------|
| <b>Mean</b>                                 |          |         |         |
| Intercept                                   | 1.4862   | 0.1432  | <.0001  |
| Age                                         | 0.8760   | 0.2035  | <.0001  |
| Unemployed                                  | 0.1989   | 0.1558  | 0.2020  |
| PHP                                         | 0.006071 | 0.1020  | 0.9525  |
| SI                                          | 0.3052   | 0.1635  | 0.0623  |
| Age*SI                                      | -0.08310 | 0.2441  | 0.7336  |
| Unemployed*SI                               | -0.1546  | 0.1636  | 0.3451  |
| PHP*SI                                      | -0.02824 | 0.1046  | 0.7873  |
| SI*SI                                       | -0.07807 | 0.05136 | 0.1289  |
| Age*SI*SI                                   | 0.05988  | 0.1240  | 0.6292  |
| Age*Age                                     | -0.3505  | 0.1136  | 0.0021  |
| Unemployed*Age                              | 0.2170   | 0.1524  | 0.1549  |
| PHP*Age                                     | 0.09972  | 0.07099 | 0.1605  |
| Age*SI*Age                                  | -0.05587 | 0.1516  | 0.7125  |
| PHP*Unemployed                              | 0.1234   | 0.1076  | 0.2521  |
| PHP*PHP                                     | -0.02395 | 0.03017 | 0.4276  |
| PHP*SI*Unemployed                           | 0.02207  | 0.1154  | 0.8484  |
| Age*SI*Unemployed                           | 0.07259  | 0.1576  | 0.6452  |
| Age*SI*Age*SI                               | -0.02124 | 0.08134 | 0.7940  |
| <b>Susceptibility probability</b>           |          |         |         |
| Intercept                                   | 0.2423   | 0.1903  | 0.2031  |
| Age                                         | 1.7107   | 0.2147  | <.0001  |
| Unemployed                                  | 0.4928   | 0.2193  | 0.0249  |
| SI                                          | 0.2117   | 0.1506  | 0.1601  |
| Age*SI                                      | -0.2673  | 0.1901  | 0.1600  |
| <b>Dispersion <math>\log(\kappa)</math></b> |          |         |         |
| Intercept                                   | -0.1059  | 0.1110  | 0.3404  |
| <b>Summary statistics</b>                   |          |         |         |
| Max logL                                    |          | -1864.4 |         |
| AIC                                         |          | 3778.8  |         |

## Web Appendix D: Sample SAS codes

```
ods output CovMatParmEst=CoV_Mat_marg;
title 'Method 1: Direct Marginal approach';
proc nlmixed data=data_temps1 GCONV=1e-20 fCONV=1e-20
ABSFCNV=1e-20 ABSGCONV=1e-20 cov;

parms beta0-beta5=0 gamma0-gamma4 = 0 log_k1 = 0;

k1=exp(log_k1);
response= d1mfs ; /*d1s d2s d1mfs d2mfs dfs1 dfs2*/
eta_marg = beta0
          + beta1*age1
          + beta2*employ_no
          + beta3*oh2
          + beta4*sugar_intake
          + beta5*age1*sugar_intake ;

eta_inf = gamma0
          + gamma1*age1
          + gamma2*employ_no
          + gamma3*sugar_intake
          + gamma4*age1*sugar_intake ;

p=exp(eta_inf)/(1+exp(eta_inf));
mu_marg = exp(eta_marg);
mu_cond =mu_marg/p;
if response=0 then loglik= log((1-p)+(p)*exp(-(1/k1)*log(1+mu_cond*k1)));
else loglik=log(p)+lgamma(response+(1/k1))-lgamma(1/k1)-lgamma(response+1)
          -(response+(1/k1))*log(1+mu_cond*k1)+response*log(mu_cond*k1);
ll=loglik;
f0=exp(-(1/k1)*log(1+mu_cond*k1));
if response=0 then p_updated=p*f0/(p*f0+1-p); else p_updated=1;
predict p_updated out=p_updated_marg;
exp_cond=log(mu_cond);
predict exp_cond out=predict_cond_mean1;
model response ~ general(ll);
run;

ods output CovMatParmEst=CoV_Mat;

title 'Method 2: Indirect Marginal approach, computing the marginal
parameter from the conditional ones';

proc nlmixed data=data_temps1 GCONV=1e-20 fCONV=1e-20 ABSFCNV=1e-20
ABSFCNV=1e-20 cov;

parms alpha0-alpha5=0 gamma0-gamma4 = 0 log_k1 = 0;

k1=exp(log_k1);
response= d1mfs; /*d1s d2s d1mfs d2mfs dfs1 dfs2*/
```

```

eta_cond =    alpha0
              + alpha1*age1
              + alpha2*employ_no
              + alpha3*oh2
              + alpha4*sugar_intake
              + alpha5*age1*sugar_intake;

eta_inf =    gamma0
             + gamma1*age1
             + gamma2*employ_no
             + gamma3*sugar_intake
             + gamma4*age1*sugar_intake;

p=exp(eta_inf)/(1+exp(eta_inf));
mu_cond = exp(eta_cond);

/* NB model */

if response=0 then
  loglik= log( (1-p) + (p)*exp(-(1/k1)*log(1+mu_cond*k1))) ;
else loglik= log(p) + lgamma(response+(1/k1)) - lgamma(1/k1) -
             lgamma(response+1) - (response+(1/k1))*log(1+mu_cond*k1)
             + response*log(mu_cond*k1);

mu_marg=p*mu_cond;
ll=loglik;
f0=exp(-(1/k1)*log(1+mu_cond*k1));
if response=0 then p_updated=p*f0/(p*f0+1-p); else p_updated=1;
model response ~ general(ll);
predict p_updated out=p_updated_cond;
predict eta_cond out=predict_cond_mean2;
predict mu_marg out=marginal_mean;
predict p out=mixing_weight;
run;

proc IML;

use marginal_mean;
read all var {age1 employ_no oh2 sugar_intake} into x_temp;

read all var {age1 employ_no sugar_intake} into z_temp;
read all var {pred} into marg_mean;

use mixing_weight;
read all var {pred} into p;

use Cov_Mat;
read all into cov_estimates;

cov_estimates=cov_estimates[, 2:nrow(cov_estimates)];

```

```

n= nrow(x_temp);

X=j(n,1)||x_temp||(x_temp[,1]#x_temp[,4]);
log_marg_mean=log(marg_mean);
beta_hat=inv(X`*X)*X`*log_marg_mean;
print beta_hat;

var_alpha_gamma=cov_estimates[1:11,1:11];
print var_alpha_gamma;

z=j(n,1)||z_temp||(z_temp[,1]#z_temp[,3]);

delta_Cov=j(n,n,0);

do i=1 to n;
  do j=1 to n;
    delta_Cov[i,j]=((X[i,])||((1-p[i,])*Z[i,]))*var_alpha_gamma
      *((X[j,])||((1-p[j,])*Z[j,]))`;
  end;
end;

Var_Cov_beta_hat=(inv(X`*X)*X`)*delta_Cov*(inv(X`*X)*X`);

print Var_Cov_beta_hat;

variances_temp=diag(Var_Cov_beta_hat);
variances=variances_temp(,+) ;
Std_err=sqrt(variances);
Z_value=beta_hat/std_err;
P_value=1-probchi(z_value#z_value,1);
Estimate=beta_hat;
Parameter={"Intercept" "age1" "employ_no" "oh2" "sugar_intake"
  "age1*sugar_intake"}`;

print Parameter Estimate Std_Err Z_value p_value;

quit;

```
